# Supplementary material for: Total Syntheses of Colletopeptide A and Colletotrichamide A
Source: MDPI journal article supplement (doi:10.3390/molecules28207194), 2023-10-20

# Supplementary Information

## Table of Contents

1. NMR comparison of natural and synthetic colletotrichamide A and colletopeptide A
2. NMR spectra

1. NMR comparison of natural and synthetic colletotrichamide A and colletopeptide A

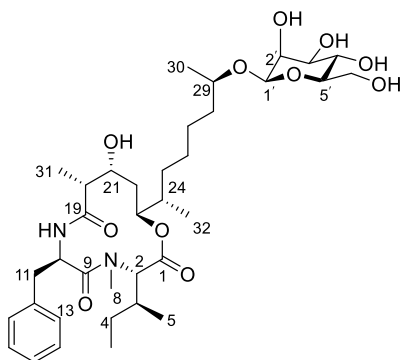

Colletotrichamide A

| No. | Colletotrichamide A    |                          |                                  |
|-----|------------------------|--------------------------|----------------------------------|
|     | Natural ( $\delta_3$ ) | Synthetic ( $\delta_4$ ) | $\Delta\delta=\delta_3-\delta_4$ |
| 1   | 168.6                  | 168.6                    | 0.0                              |
| 2   | 59.7                   | 59.8                     | -0.1                             |
| 3   | 29.8                   | 29.8                     | 0.0                              |
| 4   | 23.3                   | 23.3                     | 0.0                              |
| 5   | 9.8                    | 9.7                      | 0.1                              |
| 6   | 15.3                   | 15.3                     | 0.0                              |
| 7   |                        |                          |                                  |
| 8   | 29.8                   | 29.8                     | 0.0                              |
| 9   | 173.0                  | 173.0                    | 0.0                              |
| 10  | 49.6                   | 49.6                     | 0.0                              |
| 11  | 35.8                   | 35.8                     | 0.0                              |
| 12  | 137.7                  | 137.7                    | 0.0                              |
| 13  | 129.1                  | 129.1                    | 0.0                              |
| 14  | 128.2                  | 128.2                    | 0.0                              |
| 15  | 126.4                  | 126.4                    | 0.0                              |
| 16  | 128.2                  | 128.2                    | 0.0                              |
| 17  | 129.1                  | 129.1                    | 0.0                              |
| 18  |                        |                          |                                  |
| 19  | 173.5                  | 173.5                    | 0.0                              |
| 20  | 46.3                   | 46.3                     | 0.0                              |
| 21  | 67.0                   | 67.0                     | 0.0                              |
| 22  | 31.4                   | 31.5                     | -0.1                             |
| 23  | 76.0                   | 76.0                     | 0.0                              |
| 24  | 33.5                   | 33.5                     | 0.0                              |
| 25  | 31.7                   | 31.7                     | 0.0                              |
| 26  | 26.1                   | 26.1                     | 0.0                              |
| 27  | 25.3                   | 25.3                     | 0.0                              |
| 28  | 36.9                   | 36.9                     | 0.0                              |
| 29  | 72.3                   | 72.4                     | -0.1                             |

|           |      |      |      |
|-----------|------|------|------|
| <b>30</b> | 19.2 | 19.2 | 0.0  |
| <b>31</b> | 7.5  | 7.5  | 0.0  |
| <b>32</b> | 15.6 | 15.6 | 0.0  |
| <b>1'</b> | 97.5 | 97.5 | 0.0  |
| <b>2'</b> | 71.2 | 71.3 | -0.1 |
| <b>3'</b> | 73.9 | 73.9 | 0.0  |
| <b>4'</b> | 67.3 | 67.3 | 0.0  |
| <b>5'</b> | 77.4 | 77.4 | 0.0  |
| <b>6'</b> | 61.4 | 61.5 | -0.1 |

| No.          | Colletotrichamide A                                         |                                                               |                                                                       |
|--------------|-------------------------------------------------------------|---------------------------------------------------------------|-----------------------------------------------------------------------|
|              | Natural ( $\delta_1$ )<br>$\delta H$ (mult., <i>J</i> , Hz) | Synthetic ( $\delta_2$ )<br>$\delta H$ (mult., <i>J</i> , Hz) | $\Delta\delta=\delta_1-\delta_2$<br>$\delta H$ (mult., <i>J</i> , Hz) |
| <b>1</b>     |                                                             |                                                               |                                                                       |
| <b>2</b>     | 4.77(d, 11.5)                                               | 4.77(d, 11.6)                                                 | 0.00                                                                  |
| <b>3</b>     | 1.83 (m)                                                    | 1.86 (m)                                                      | -0.03                                                                 |
| <b>4</b>     | 0.95 (m)                                                    | 0.95 (m)                                                      | 0.00                                                                  |
|              | 0.68 (m)                                                    | 0.67 (m)                                                      | 0.01                                                                  |
| <b>5</b>     | 0.68(m)                                                     | 0.67 (m)                                                      | 0.01                                                                  |
| <b>6</b>     | 0.79 (d, 6.5)                                               | 0.79 (d, 6.4)                                                 | 0.00                                                                  |
| <b>7</b>     |                                                             |                                                               |                                                                       |
| <b>8</b>     | 2.66 (s)                                                    | 2.66 (s)                                                      | 0.00                                                                  |
| <b>9</b>     |                                                             |                                                               |                                                                       |
| <b>10</b>    | 5.06 (dt, 9.5, 6.0)                                         | 5.06 (dt, <i>J</i> = 9.4, 6.2)                                | 0.00                                                                  |
| <b>11</b>    | 3.08 (dd, 13.0, 9.5)                                        | 3.08 (dd, 12.9, 9.4)                                          | 0.00                                                                  |
|              | 2.84 (dd, 13.0, 6.0)                                        | 2.84 (dd, 12.8, 6.2)                                          | 0.00                                                                  |
| <b>12</b>    |                                                             |                                                               |                                                                       |
| <b>13</b>    | 7.22 (d, 7.0)                                               | 7.23 (d, 4.0)                                                 | -0.01                                                                 |
| <b>14</b>    | 7.24 (d, 7.0)                                               | 7.26 (d, 7.1)                                                 | -0.02                                                                 |
| <b>15</b>    | 7.19 (m)                                                    | 7.19 (m)                                                      | 0.00                                                                  |
| <b>16</b>    | 7.24 (d, 7.0)                                               | 7.26 (d, 7.1)                                                 | -0.02                                                                 |
| <b>17</b>    | 7.22 (d, 7.0)                                               | 7.23 (d, 4.0)                                                 | -0.01                                                                 |
| <b>18</b>    | 8.61 (d, 9.5)                                               | 8.58 (d, 9.5)                                                 | 0.03                                                                  |
| <b>19</b>    |                                                             |                                                               |                                                                       |
| <b>20</b>    | 2.57 (dq, 6.5, 3.5)                                         | 2.58 (dt, 6.9, 4.0),                                          | -0.01                                                                 |
| <b>21</b>    | 3.87 (ddd, 8.5, 5.5, 3.5)                                   | 3.88 (d, 8.9)                                                 | -0.01                                                                 |
| <b>21-OH</b> | 4.51 (d, 5.5)                                               | 4.50 (d, 5.1)                                                 | 0.01                                                                  |
| <b>22</b>    | 1.51 (m)                                                    | 1.51 (m)                                                      | 0.00                                                                  |
|              | 1.44 (dd, 15.0, 3.5)                                        | 1.44 (d, 17.1)                                                | 0.00                                                                  |
| <b>23</b>    | 4.63 (dt, 10.5, 3.0)                                        | 4.64 (d, 10.0),                                               | -0.01                                                                 |
| <b>24</b>    | 1.86 (m)                                                    | 1.86 (m)                                                      | 0.00                                                                  |
| <b>25</b>    | 1.55 (m)                                                    | 1.51 (m)                                                      | 0.04                                                                  |

|              |                            |                            |       |
|--------------|----------------------------|----------------------------|-------|
|              | 0.99 (dd, 10.5, 3.0)       | 0.98 (s)                   | 0.01  |
| <b>26</b>    | 1.23 (m)                   | 1.23 (s)                   | 0.00  |
|              | 1.17 (m)                   | 1.16 (m)                   | 0.01  |
| <b>27</b>    | 1.26 (m)                   | 1.26 (m)                   | 0.00  |
| <b>28</b>    | 1.51 (m)                   | 1.51 (m)                   | 0.00  |
|              | 1.34 (dt, 13.5, 6.5)       | 1.34 (d, 6.8)              | 0.00  |
| <b>29</b>    | 3.77(sextet, 6.0)          | 3.77 (q, 6.2)              | 0.00  |
| <b>30</b>    | 1.05 (d, 6.0)              | 1.06 (d, 6.1)              | -0.01 |
| <b>31</b>    | 0.84 (d, 6.5)              | 0.84 (d, 6.8)              | 0.00  |
| <b>32</b>    | 0.71 (d, 6.5)              | 0.71 (d, 6.5)              | 0.00  |
| <b>1'</b>    | 4.43 (s)                   | 4.43 (s)                   | 0.00  |
| <b>2'</b>    | 3.54 (dd, 5.0, 2.0)        | 3.54 (s)                   | 0.00  |
| <b>2'-OH</b> | 4.18 (d, 5.0)              | 4.17 (d, 4.3)              | 0.01  |
| <b>3'</b>    | 3.26 (m)                   | 3.26 (m)                   | 0.00  |
| <b>3'-OH</b> | 4.53 (d, 5.0)              | 4.53 (s)                   | 0.00  |
| <b>4'</b>    | 3.26 (m)                   | 3.26 (m)                   | 0.00  |
| <b>4'-OH</b> | 4.71 (d, 4.5)              | 4.71 (s)                   | 0.00  |
| <b>5'</b>    | 3.01 (ddd, 8.5, 5.5, 2.0)  | 3.01 (dt, 6.5, 3.0)        | 0.00  |
| <b>6'</b>    | 3.67 (ddd, 11.5, 5.5, 2.0) | 3.67 (ddd, 11.5, 5.3, 2.2) | 0.00  |
|              | 3.44 (dt, 11.5, 5.5)       | 3.45 (m)                   | -0.01 |
| <b>6'-OH</b> | 4.37 (t, 5.5)              | 4.35 (t, 5.5)              | 0.02  |

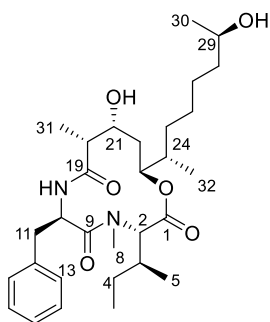

Colleteopeptide A

| No. | Colleteopeptide A      |                          |                                  |
|-----|------------------------|--------------------------|----------------------------------|
|     | Natural ( $\delta_3$ ) | Synthetic ( $\delta_4$ ) | $\Delta\delta=\delta_3-\delta_4$ |
| 1   | 170.1                  | 170.1                    | 0.0                              |
| 2   | 62.1                   | 62.1                     | 0.0                              |
| 3   | 31.7                   | 31.7                     | 0.0                              |
| 4   | 24.9                   | 24.9                     | 0.0                              |
| 5   | 10.3                   | 10.3                     | 0.0                              |
| 6   | 15.9                   | 15.9                     | 0.0                              |
| 7   |                        |                          |                                  |
| 8   | 30.8                   | 30.9                     | -0.1                             |
| 9   | 175.2                  | 175.2                    | 0.0                              |
| 10  | 51.8                   | 51.8                     | 0.0                              |
| 11  | 37.4                   | 37.4                     | 0.0                              |
| 12  | 138.4                  | 138.4                    | 0.0                              |
| 13  | 130.3                  | 130.3                    | 0.0                              |
| 14  | 129.6                  | 129.6                    | 0.0                              |
| 15  | 127.9                  | 127.9                    | 0.0                              |
| 16  | 129.6                  | 129.6                    | 0.0                              |
| 17  | 130.3                  | 130.3                    | 0.0                              |
| 18  |                        |                          |                                  |
| 19  | 176.4                  | 176.4                    | 0.0                              |
| 20  | 48.7                   | 48.7                     | 0.0                              |
| 21  | 69.1                   | 69.1                     | 0.0                              |
| 22  | 32.7                   | 32.7                     | 0.0                              |
| 23  | 77.8                   | 77.9                     | -0.1                             |
| 24  | 35.3                   | 35.3                     | 0.0                              |
| 25  | 33.3                   | 33.3                     | 0.0                              |
| 26  | 27.6                   | 27.6                     | 0.0                              |
| 27  | 27.1                   | 27.1                     | 0.0                              |
| 28  | 40.2                   | 40.2                     | 0.0                              |
| 29  | 68.5                   | 68.6                     | -0.1                             |
| 30  | 23.5                   | 23.5                     | 0.0                              |
| 31  | 7.8                    | 7.8                      | 0.0                              |
| 32  | 16.3                   | 16.3                     | 0.0                              |

| No.   | Colletopeptide A                                    |                                                       |                                                               |
|-------|-----------------------------------------------------|-------------------------------------------------------|---------------------------------------------------------------|
|       | Natural ( $\delta_1$ )<br>$\delta H$ (mult., J, Hz) | Synthetic ( $\delta_2$ )<br>$\delta H$ (mult., J, Hz) | $\Delta\delta=\delta_1-\delta_2$<br>$\delta H$ (mult., J, Hz) |
| 1     |                                                     |                                                       |                                                               |
| 2     | 4.84 (d, 11.6)                                      | 4.85 (s)                                              | -0.01                                                         |
| 3     | 1.89 (m)                                            | 1.89 (m)                                              | 0.00                                                          |
| 4     | 0.95 (m)                                            | 0.95 (m)                                              | 0.00                                                          |
|       | 0.75 (m)                                            | 0.74 (m)                                              | 0.01                                                          |
| 5     | 0.74 (d, 3.8)                                       | 0.74 (d, 3.5)                                         | 0.00                                                          |
| 6     | 0.86 (d, 6.5)                                       | 0.86 (d, 6.5)                                         | 0.00                                                          |
| 7     |                                                     |                                                       |                                                               |
| 8     | 2.71 (s)                                            | 2.71 (s)                                              | 0.00                                                          |
| 9     |                                                     |                                                       |                                                               |
| 10    | 5.26 (dd, 10.8, 5.3)                                | 5.26 (dd, J = 10.7, 5.3)                              | 0.00                                                          |
| 11    | 3.22 (dd, 12.8, 10.8)                               | 3.22 (dd, 12.8, 10.7)                                 | 0.00                                                          |
|       | 2.91 (dd, 12.8, 5.3)                                | 2.91 (dd, 12.8, 5.3)                                  | 0.00                                                          |
| 12    |                                                     |                                                       |                                                               |
| 13    | 7.26 (overlap)                                      | 7.26 (m)                                              | 0.00                                                          |
| 14    | 7.26 (overlap)                                      | 7.26 (m)                                              | 0.00                                                          |
| 15    | 7.21 (m)                                            | 7.21 (m)                                              | 0.00                                                          |
| 16    | 7.26 (overlap)                                      | 7.26 (m)                                              | 0.00                                                          |
| 17    | 7.26 (overlap)                                      | 7.26 (m)                                              | 0.00                                                          |
| 18    |                                                     |                                                       |                                                               |
| 19    |                                                     |                                                       |                                                               |
| 20    | 2.65 (m)                                            | 2.66 (m)                                              | -0.01                                                         |
| 21    | 4.03 (dd, 8.4, 3.9)                                 | 4.04 (dd, 8.3, 3.6)                                   | -0.01                                                         |
| 21-OH |                                                     | 4.55 (s)                                              |                                                               |
| 22    | 1.69 (ddd, 15.7, 8.4, 2.0)                          | 1.69 (ddd, 15.8, 8.4, 2.2)                            | 0.00                                                          |
|       | 1.59 (dd, 15.7, 3.9)                                | 1.59 (m)                                              | 0.00                                                          |
| 23    | 4.76 (d-like, 10.4)                                 | 4.76 (ddd, 10.6, 4.3, 2.2)                            | 0.00                                                          |
| 24    | 1.98 (m)                                            | 1.99 (m)                                              | -0.01                                                         |
| 25    | 1.62 (m)                                            | 1.63 (m)                                              | -0.01                                                         |
|       | 1.05 (m)                                            | 1.05 (m)                                              | 0.00                                                          |
| 26    | 1.29 (m)                                            | 1.30 (m)                                              | -0.01                                                         |
| 27    | 1.36 (overlap)                                      | 1.37 (m)                                              | -0.01                                                         |
| 28    | 1.46 (m)                                            | 1.47 (m)                                              | -0.01                                                         |
|       | 1.36 (overlap)                                      | 1.37 (m)                                              | -0.01                                                         |
| 29    | 3.70 (m)                                            | 3.71 (m)                                              | -0.01                                                         |
| 30    | 1.14 (d, 6.2)                                       | 1.14 (d, 6.1)                                         | 0.00                                                          |
| 31    | 1.00 (d, 6.8)                                       | 1.01 (d, 6.9)                                         | -0.01                                                         |
| 32    | 0.80 (d, 6.6)                                       | 0.80 (d, 6.6)                                         | 0.00                                                          |

**Figures S1**  $^1\text{H}$  NMR Spectrum of **9**

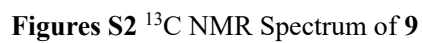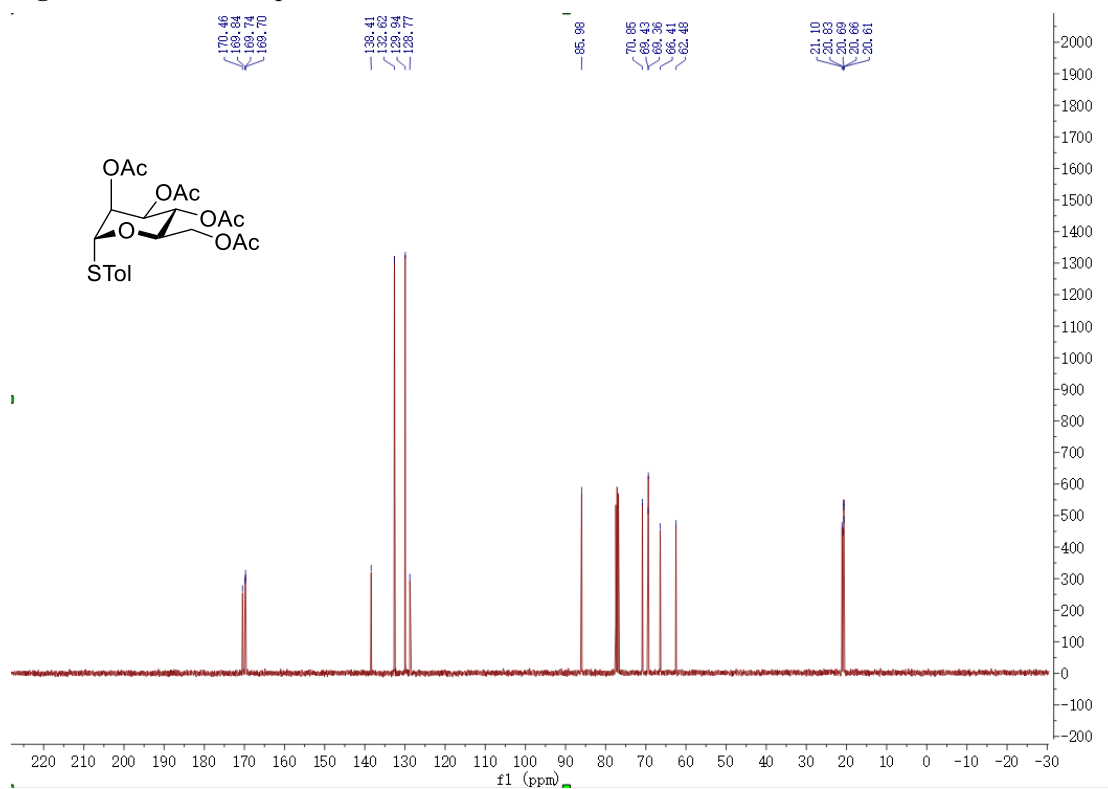

**Figures S3**  $^1\text{H}$  NMR Spectrum of **10**

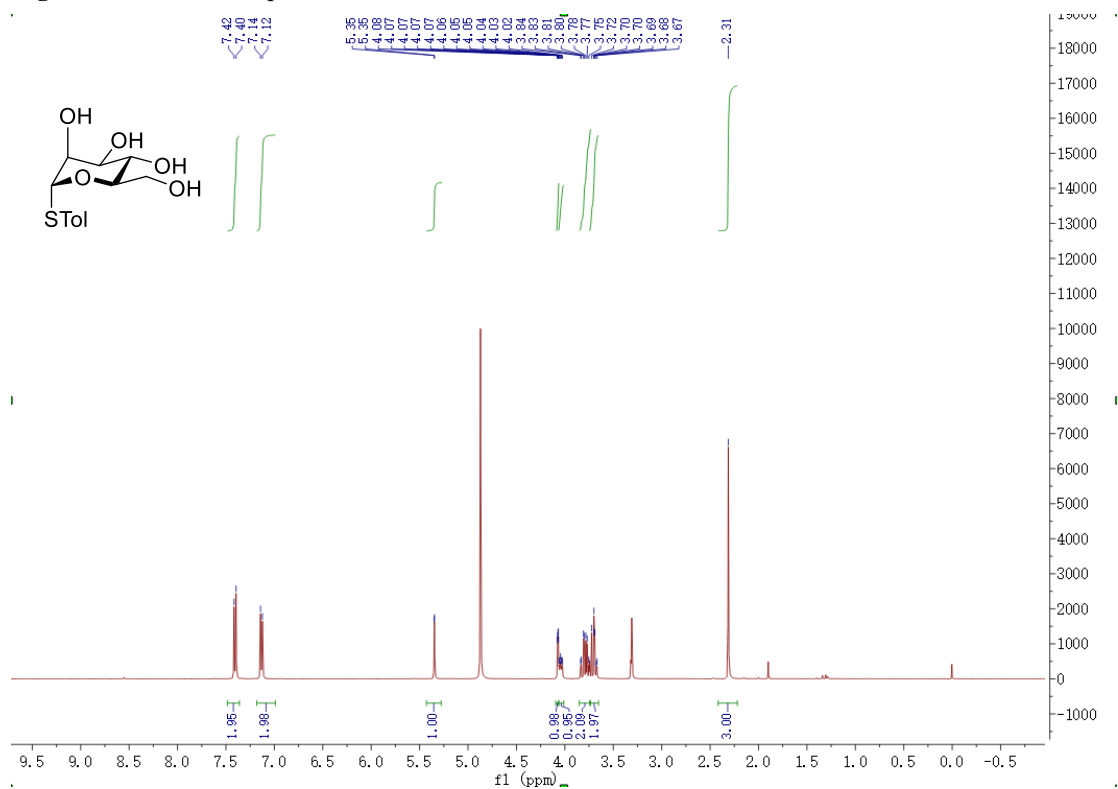

**Figures S4**  $^{13}\text{C}$  NMR Spectrum of **10**

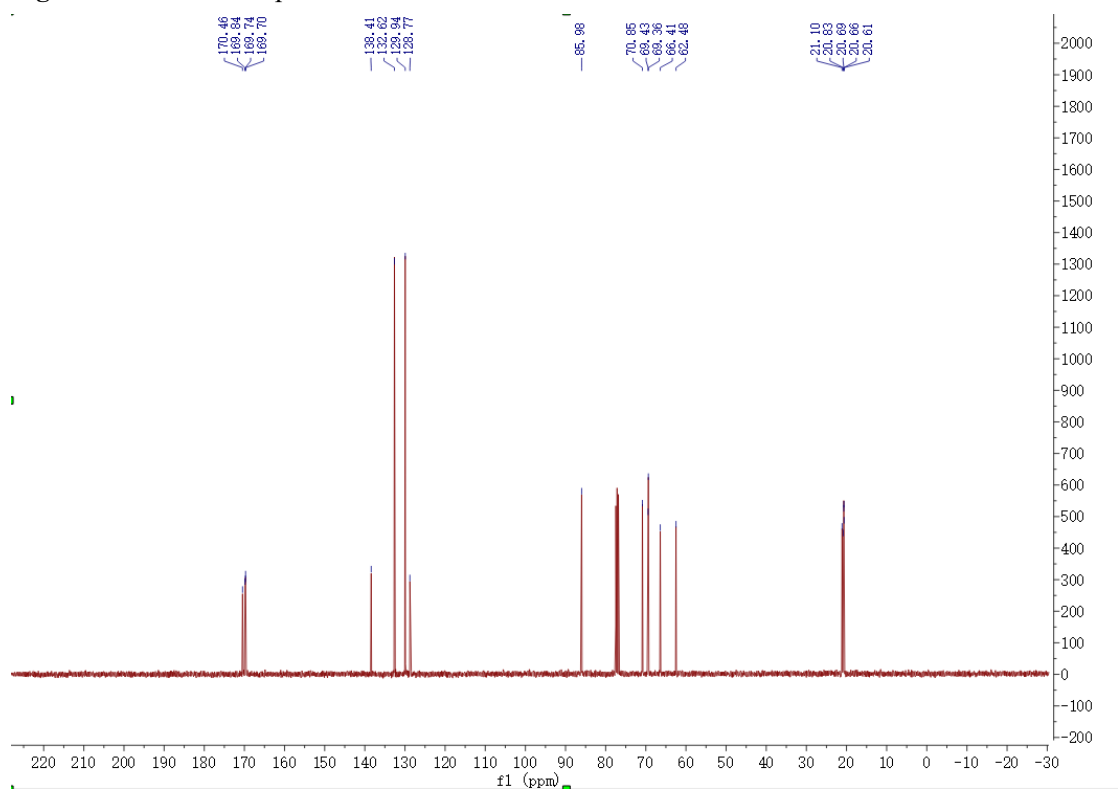



**Figures S5**  $^1\text{H}$  NMR Spectrum of **12**

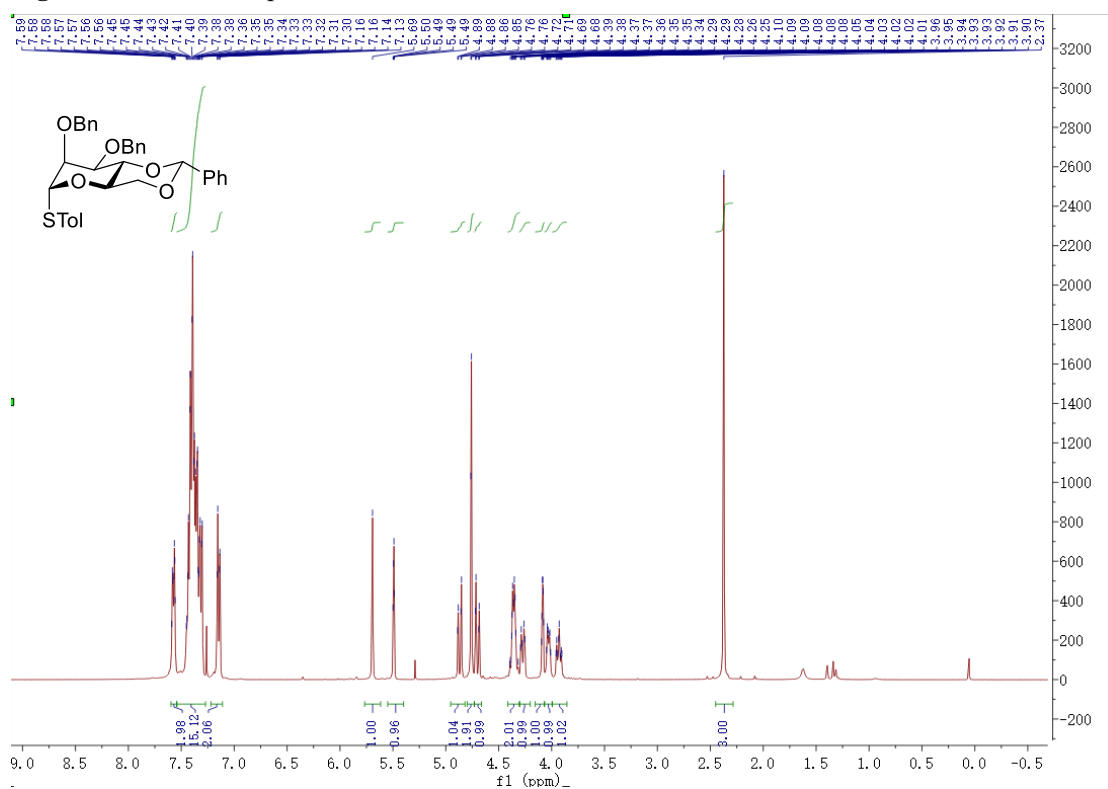

**Figures S6**  $^{13}\text{C}$  NMR Spectrum of **12**

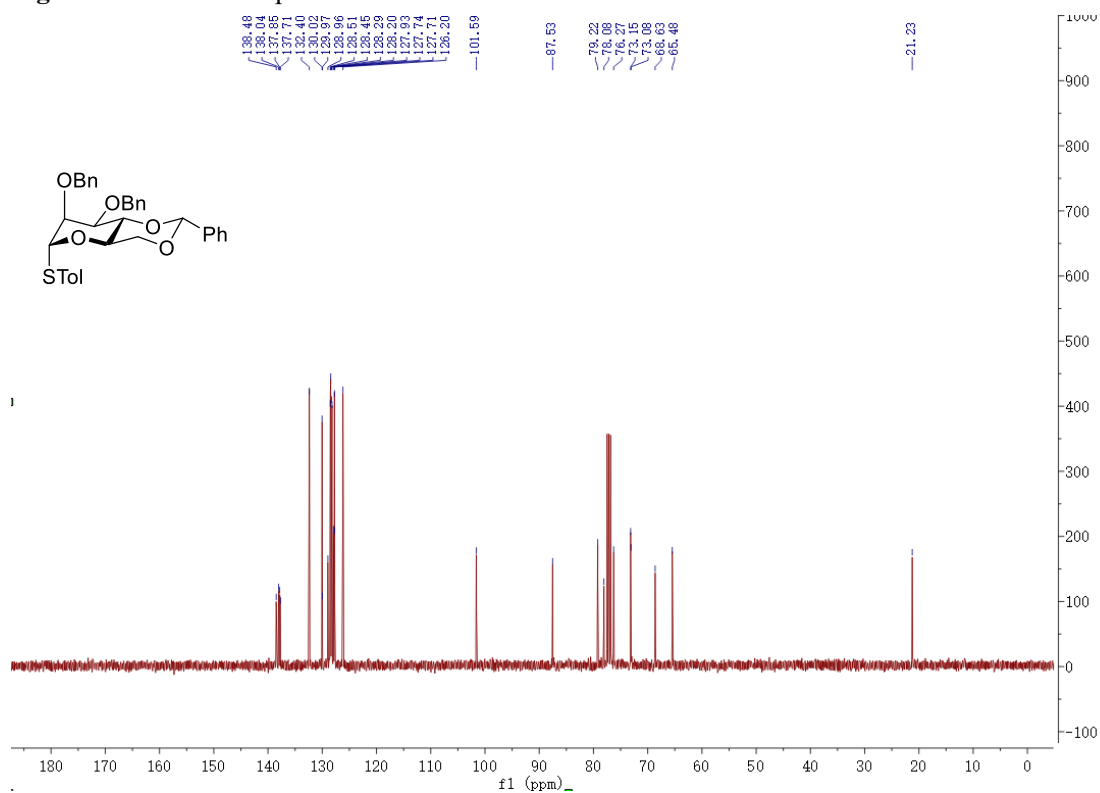

**Figures S7**  $^1\text{H}$  NMR Spectrum of **3**

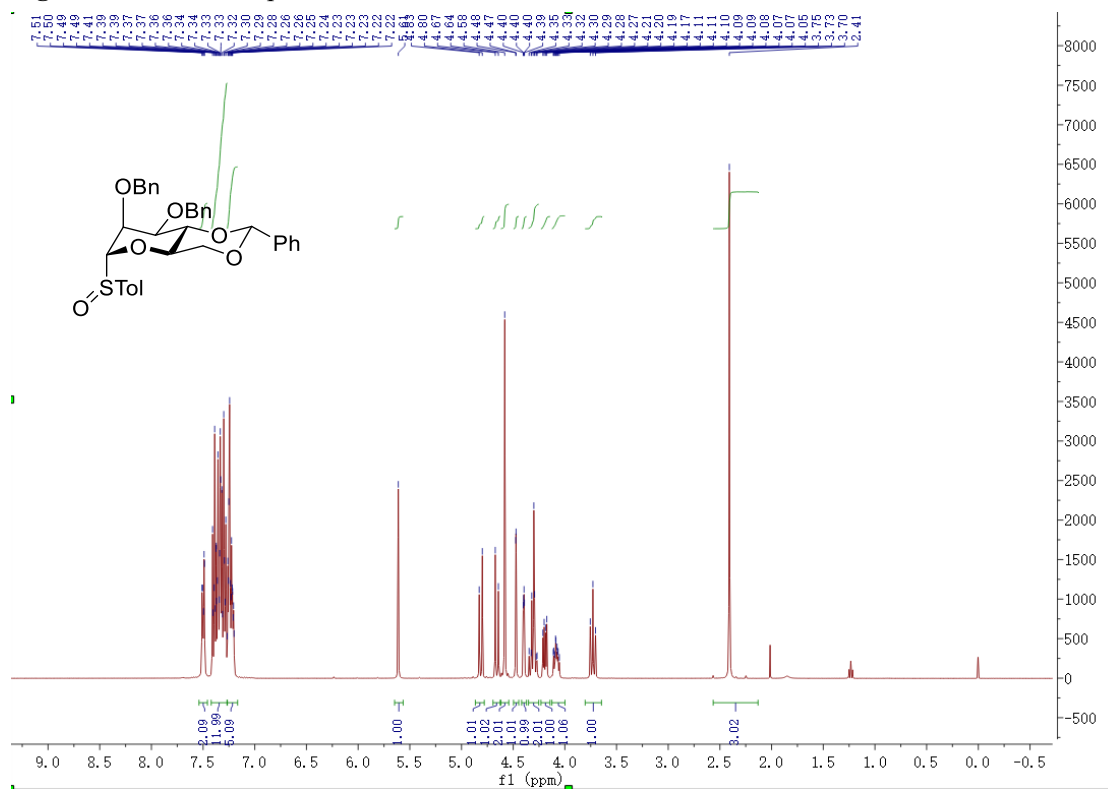

**Figures S8**  $^{13}\text{C}$  NMR Spectrum of **3**

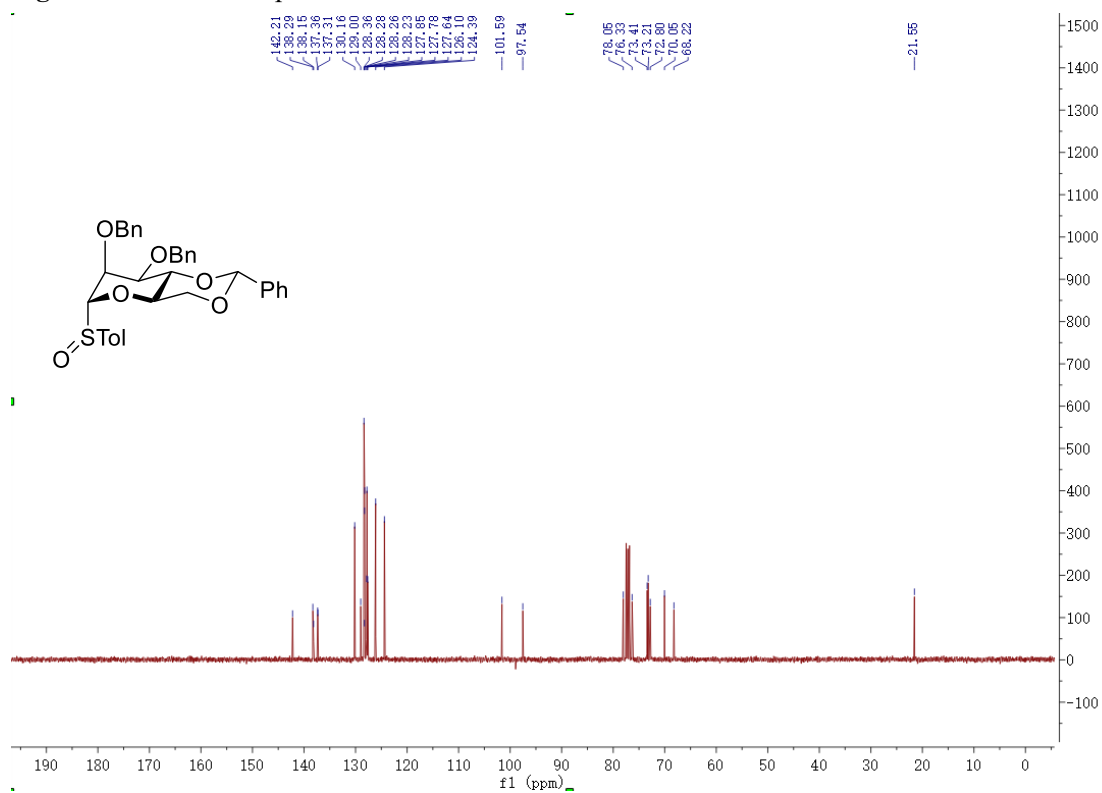

Figures S9  $^1\text{H}$  NMR Spectrum of **5**

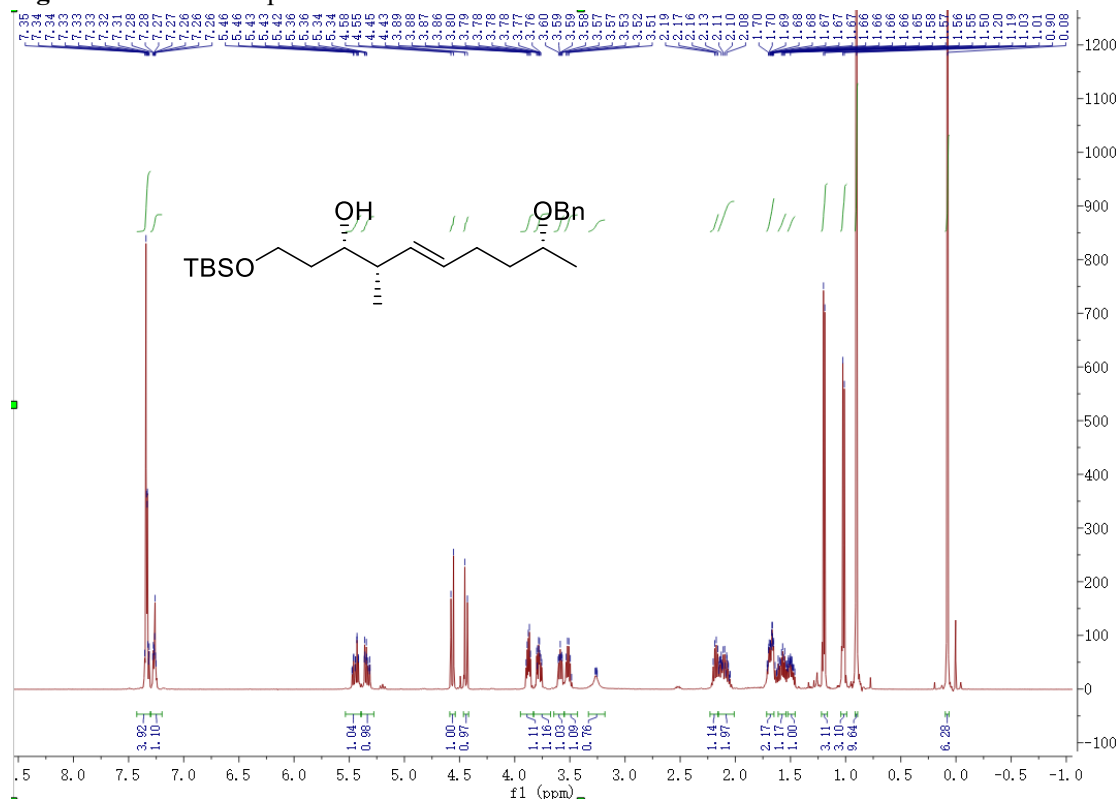

Figures S10  $^{13}\text{C}$  NMR Spectrum of **5**

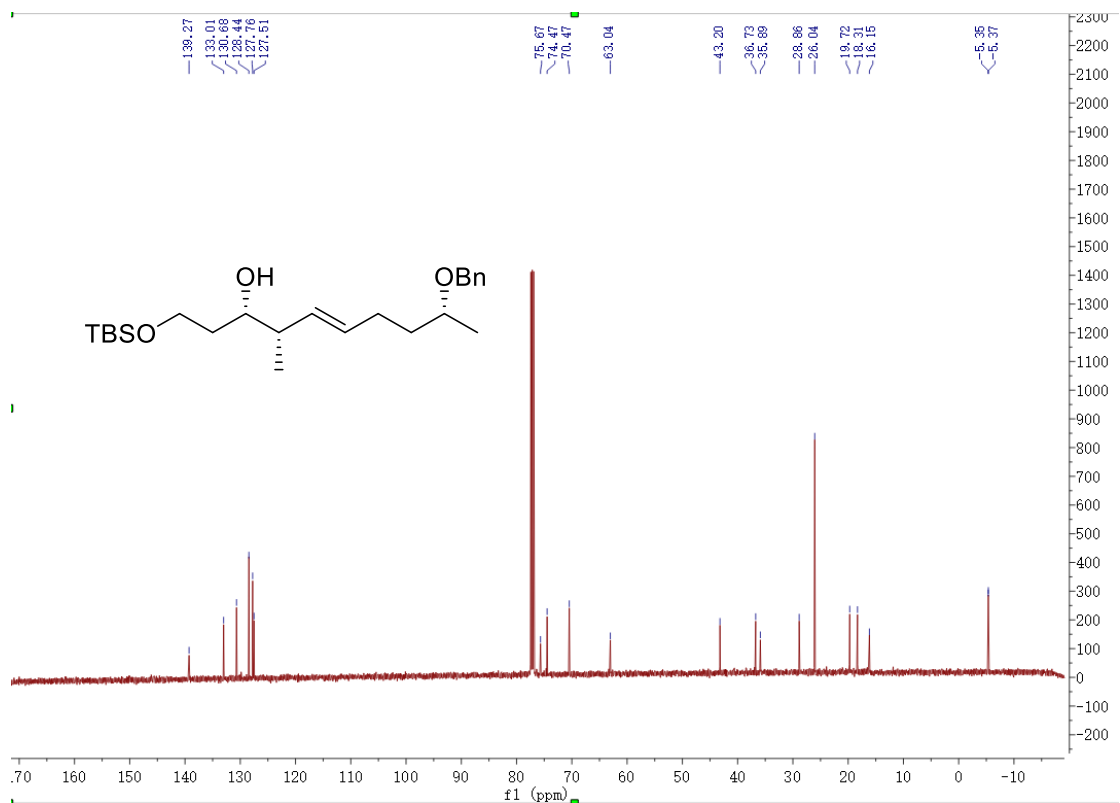

Chemical structure of compound 10 is shown. The <sup>13</sup>C NMR spectrum (f1 (ppm)) displays peaks corresponding to the structure, with labeled chemical shifts (ppm): 171.10, 170.63, 156.07, 155.63, 139.19, 137.48, 136.45, 131.19, 128.37, 127.69, 127.62, 127.45, 80.10, 78.88, 78.37, 74.37, 70.42, 63.47, 62.26, 60.83, 59.54, 58.99, 40.39, 36.58, 34.71, 34.60, 33.27, 32.17, 30.22, 29.56, 28.79, 28.46, 26.02, 24.88, 23.46, 19.68, 19.54, 18.33, 18.29, 16.28, 15.99, 10.77, 10.32, 5.24, and -5.24.

**Figures S13**  $^1\text{H}$  NMR Spectrum of **18**

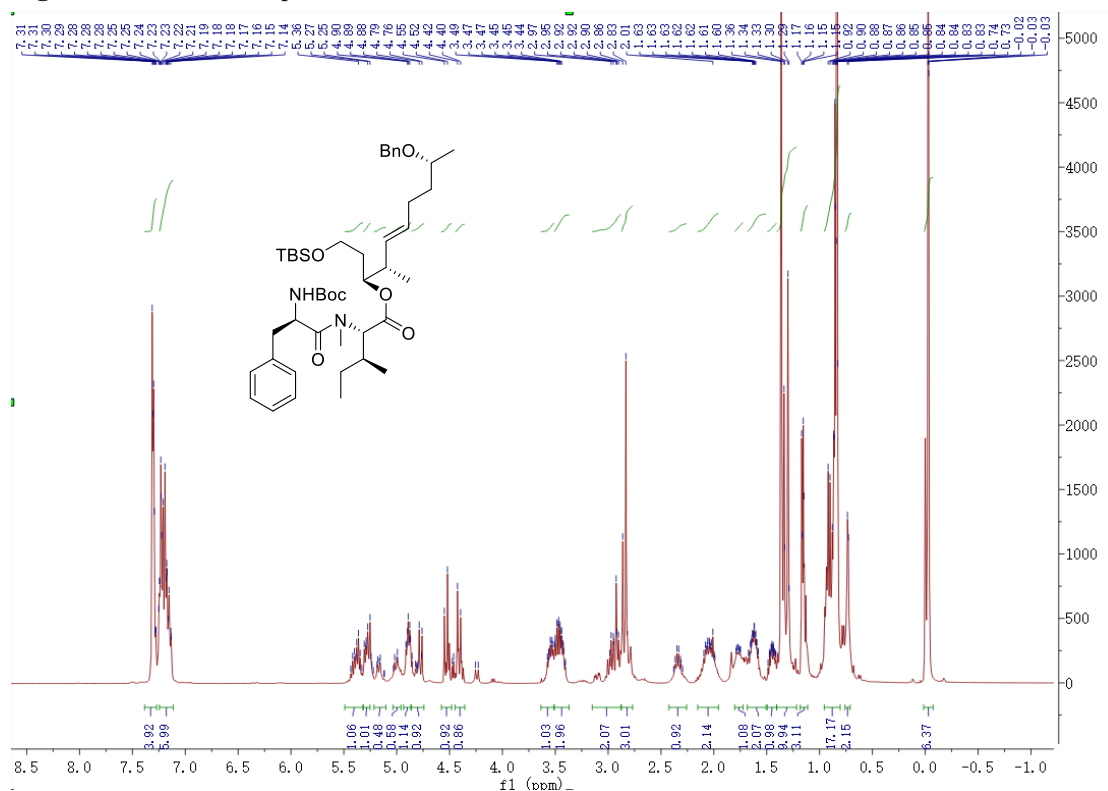

**Figures S14**  $^{13}\text{C}$  NMR Spectrum of **18**

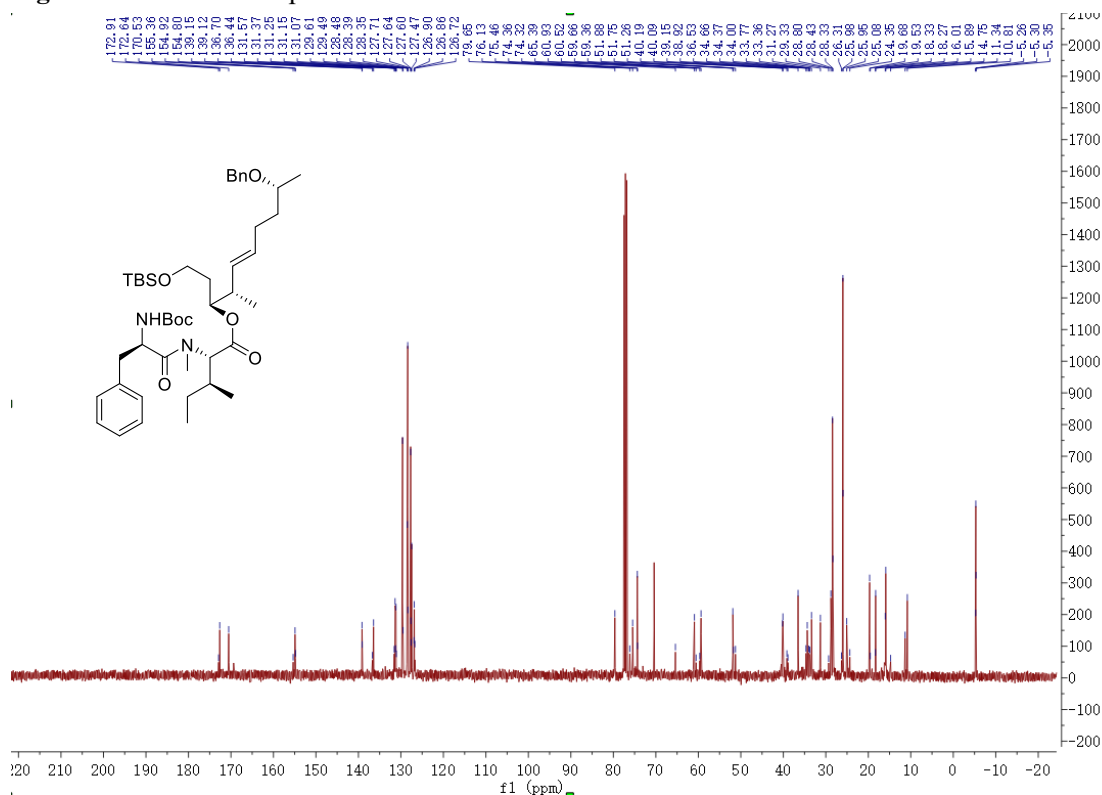

Figures S15  $^1\text{H}$  NMR Spectrum of 19

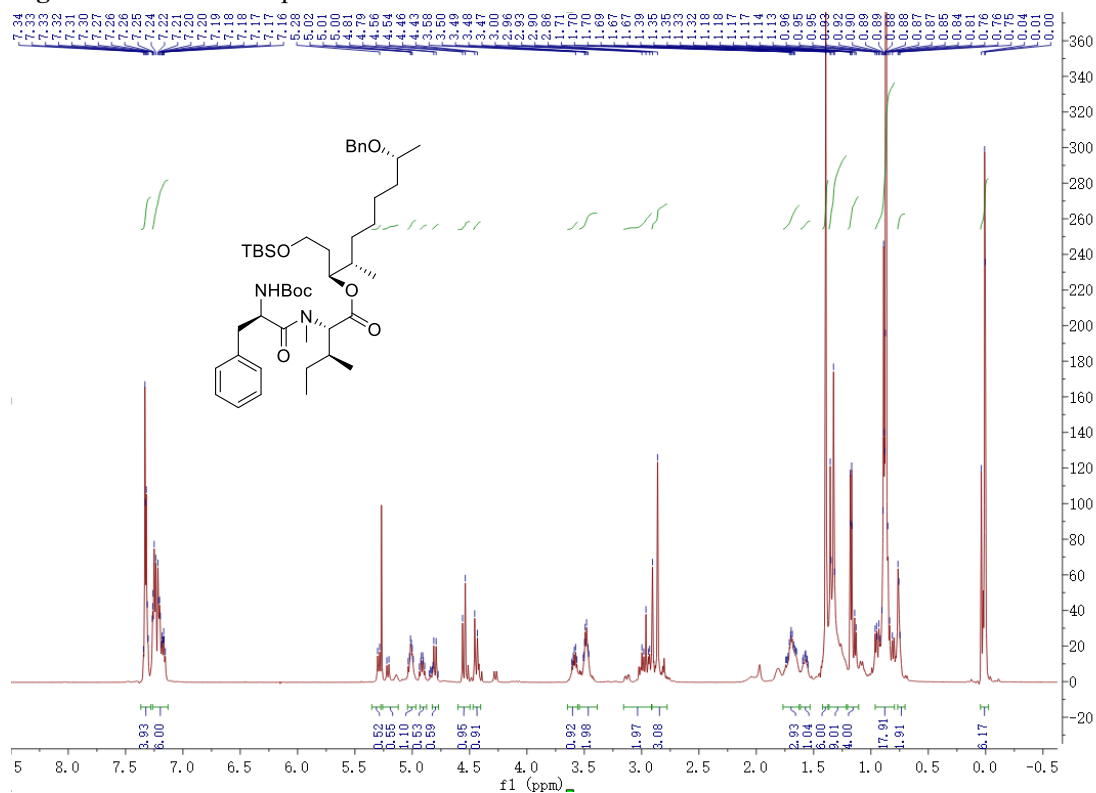

Figures S16  $^{13}\text{C}$  NMR Spectrum of 19

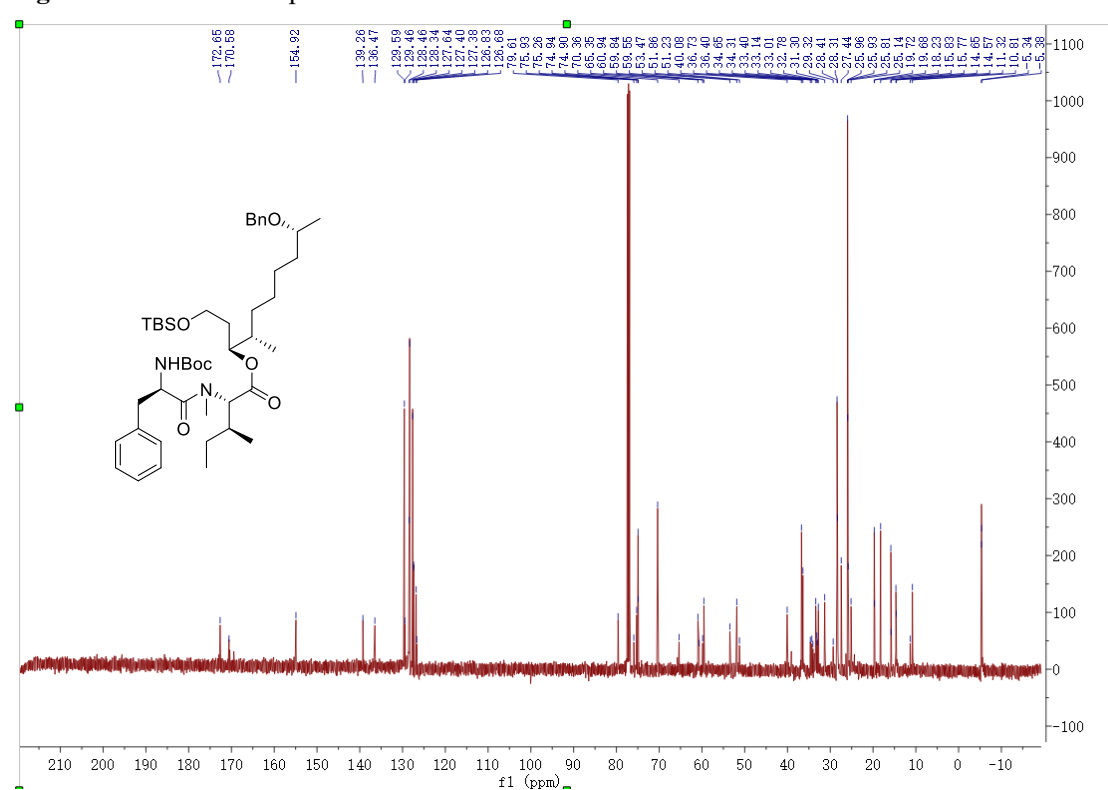

**Figures S17**  $^1\text{H}$  NMR Spectrum of **20**

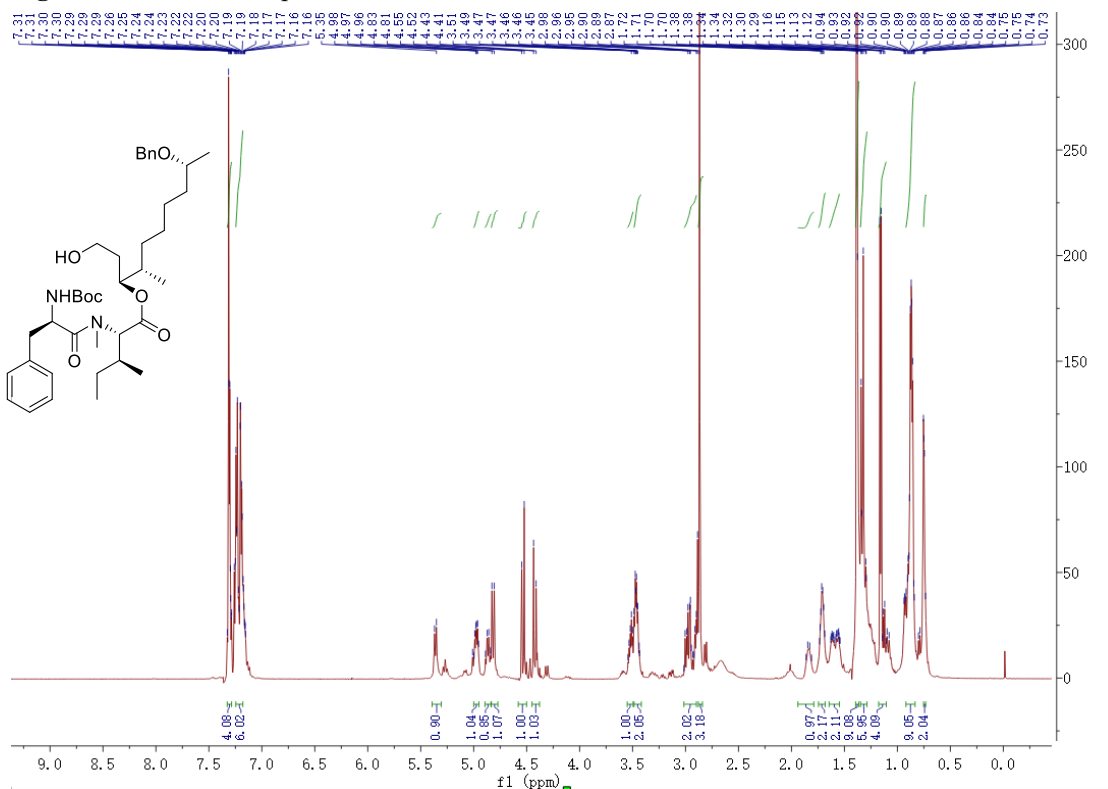

**Figures S18**  $^{13}\text{C}$  NMR Spectrum of **20**

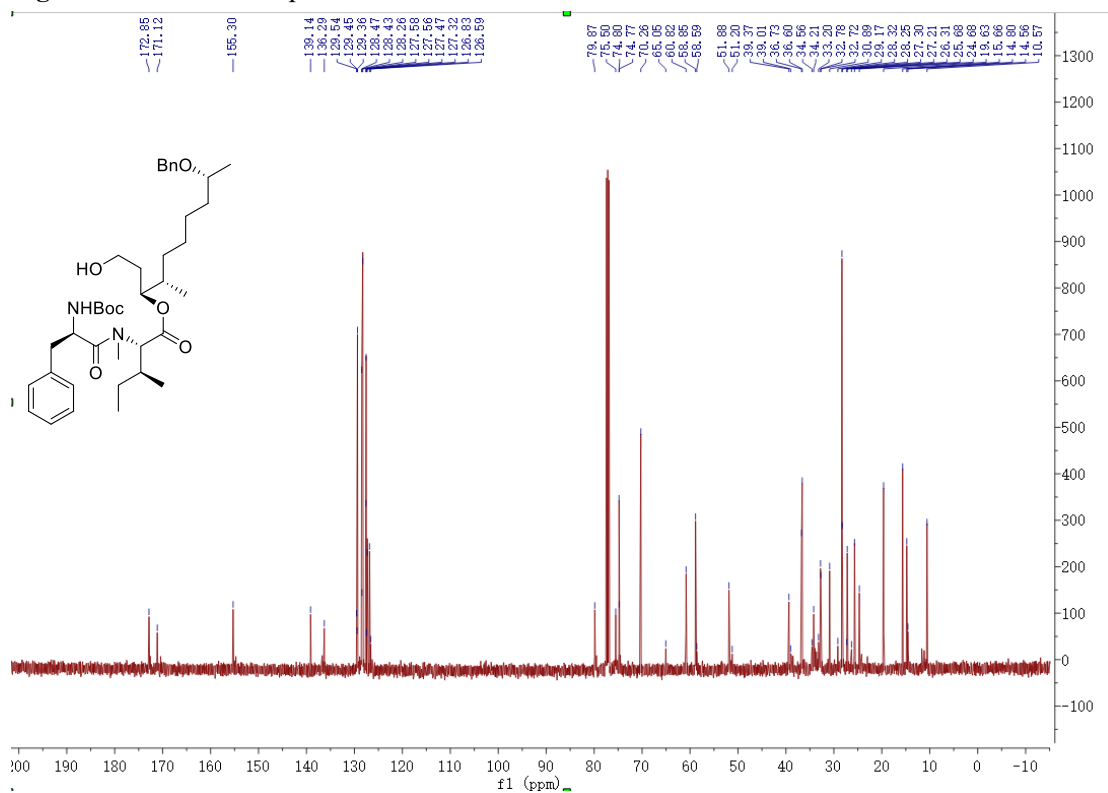

**Figures S19**  $^1\text{H}$  NMR Spectrum of **21**

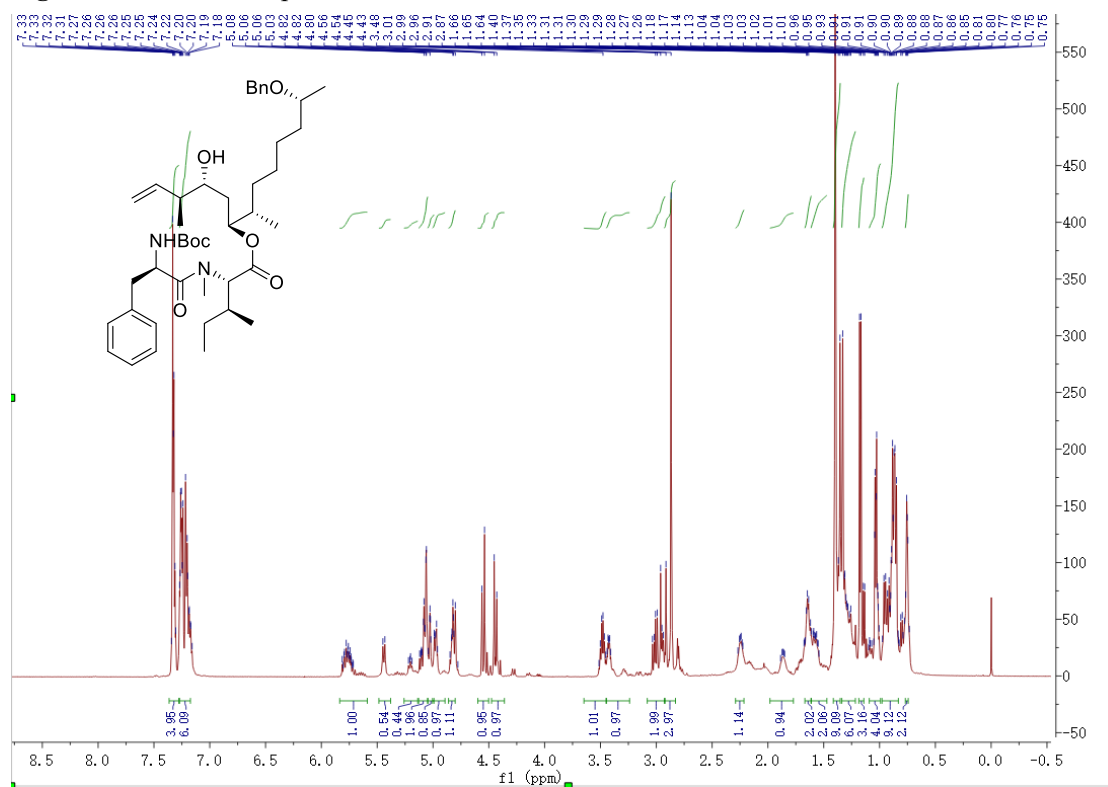

**Figures S20**  $^{13}\text{C}$  NMR Spectrum of **21**

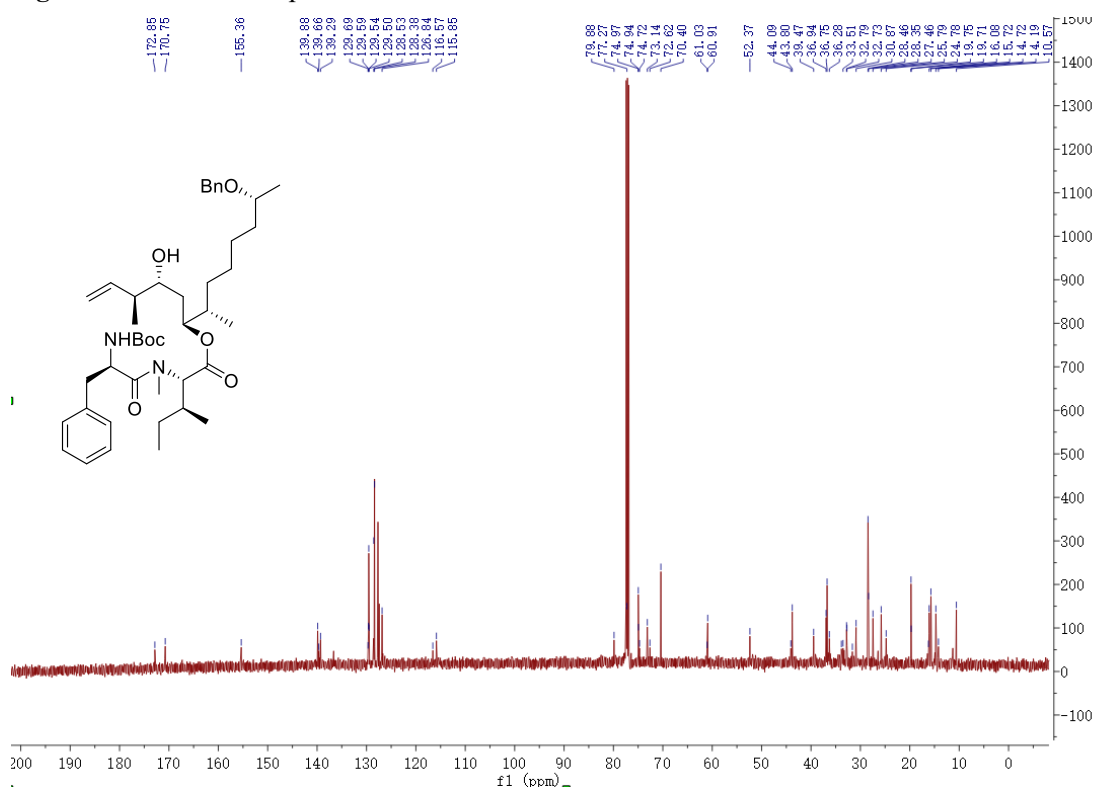



[illegible]

Chemical structure of compound 10 is shown in the top left. The  $^1\text{H}$  NMR spectrum (CDCl<sub>3</sub>) is displayed below the structure, showing peaks from -10 to 210 ppm. The x-axis is labeled f1 (ppm) and the y-axis represents intensity from 0 to 2100.

**Figures S23**  $^1\text{H}$  NMR Spectrum of **23**

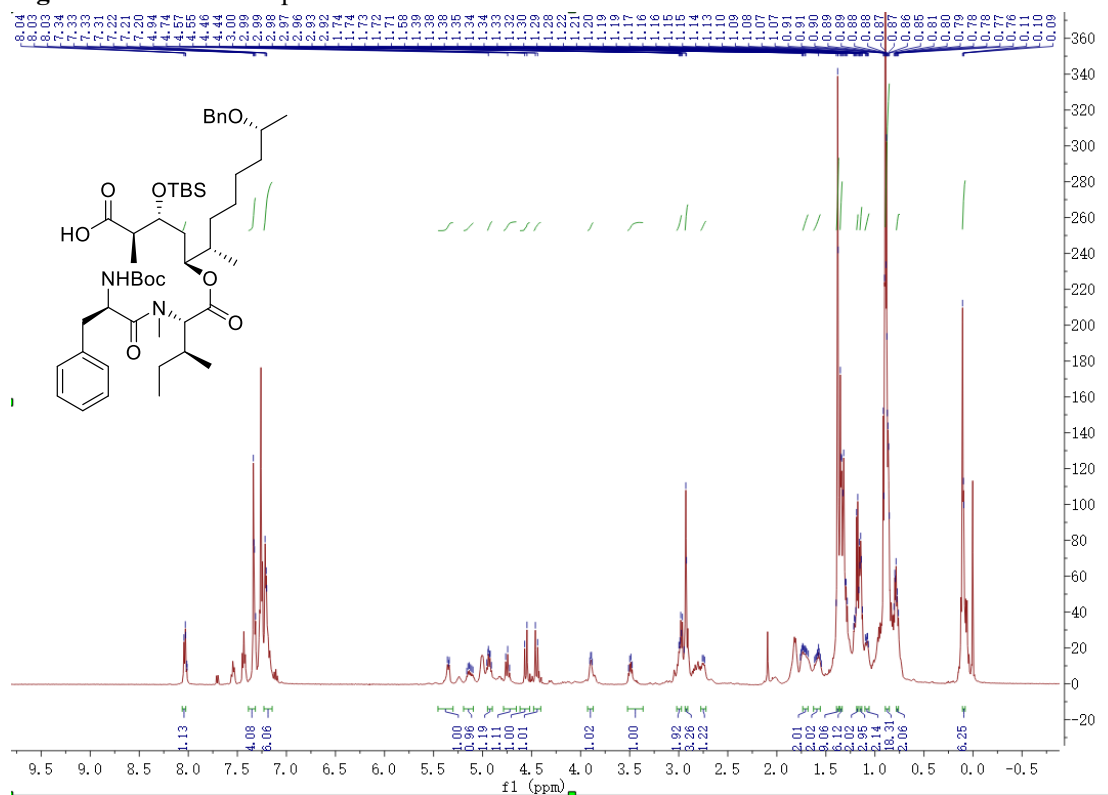

**Figures S24**  $^{13}\text{C}$  NMR Spectrum of **23**

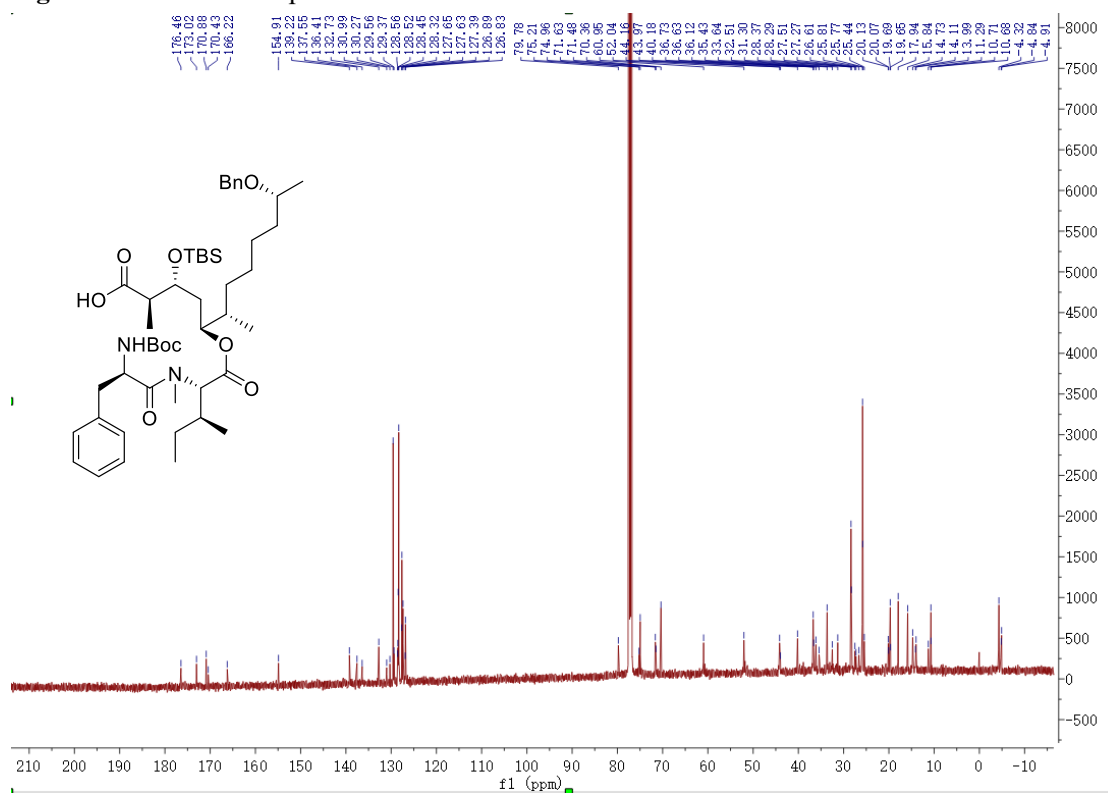

**Figures S25**  $^1\text{H}$  NMR Spectrum of **24**

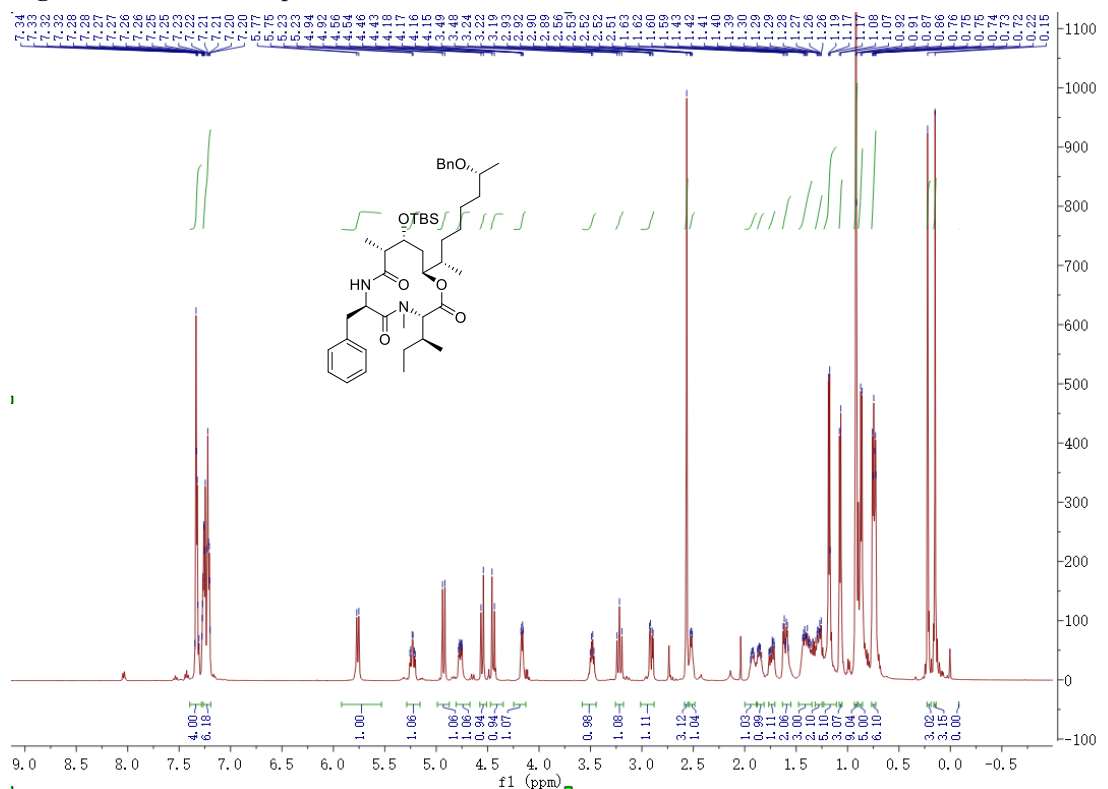

**Figures S26**  $^{13}\text{C}$  NMR Spectrum of **24**

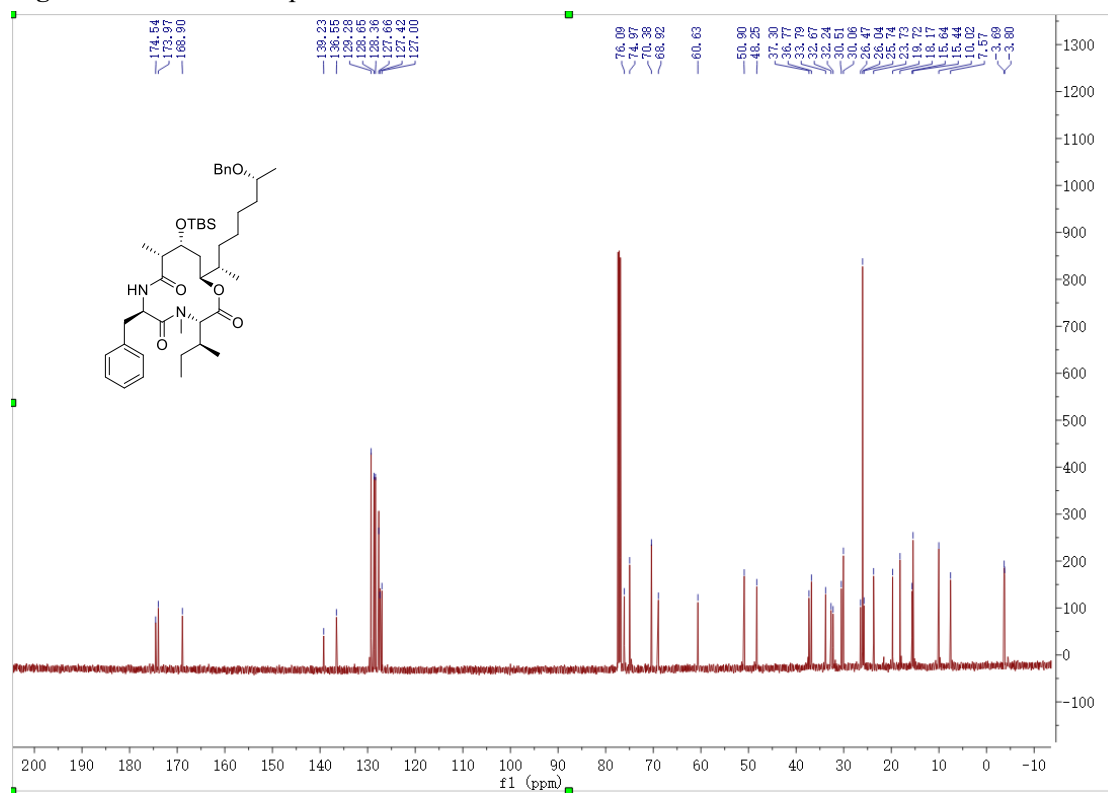

Figures S27  $^1\text{H}$  NMR Spectrum of 4

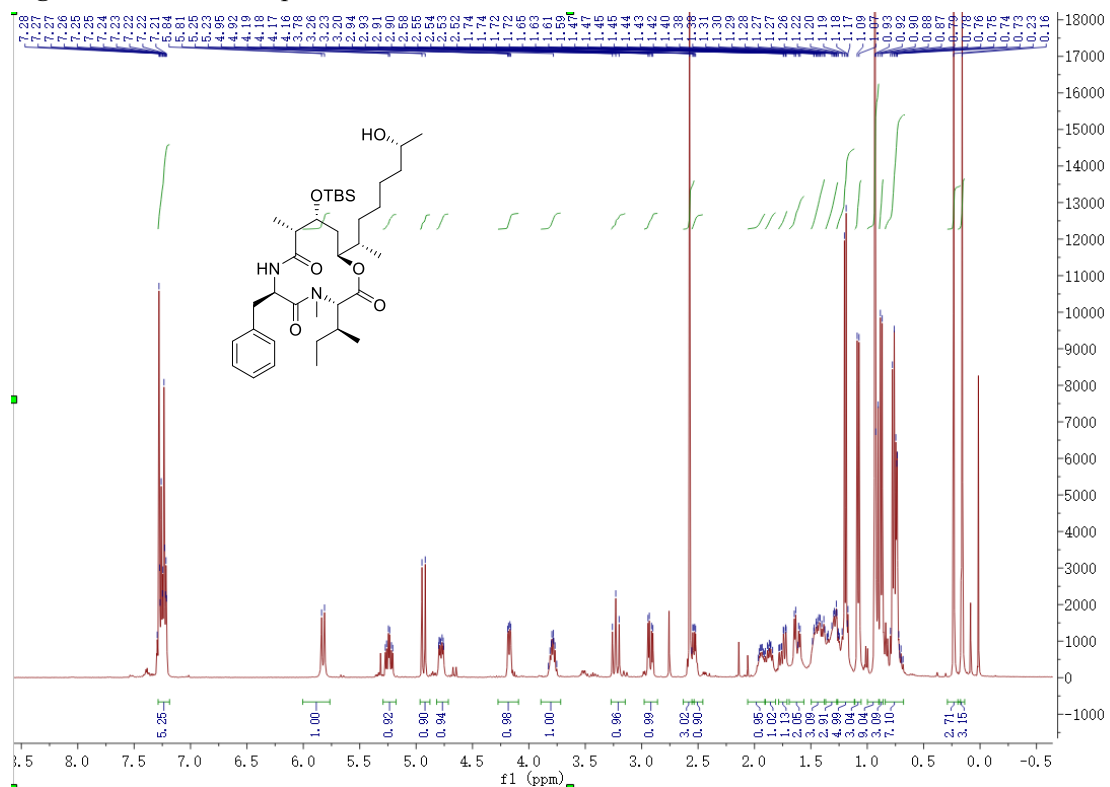

Figures S28  $^{13}\text{C}$  NMR Spectrum of 4

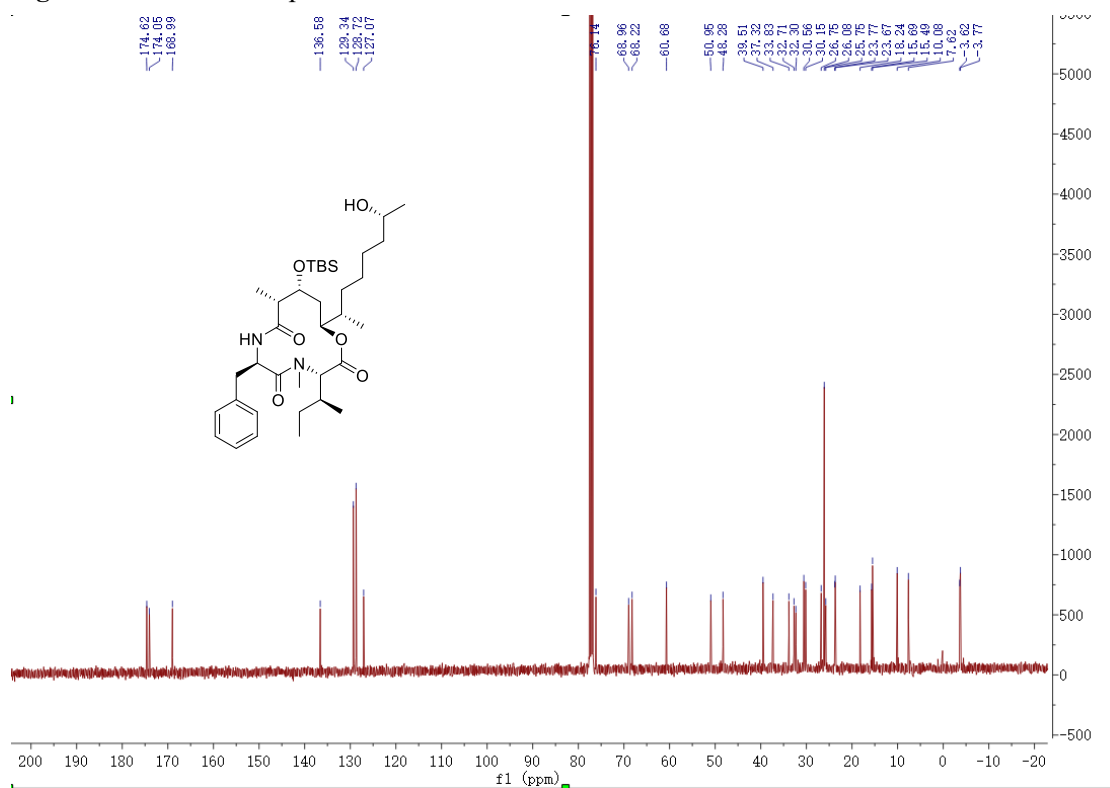

**Figures S29**  $^1\text{H}$  NMR Spectrum of **25**

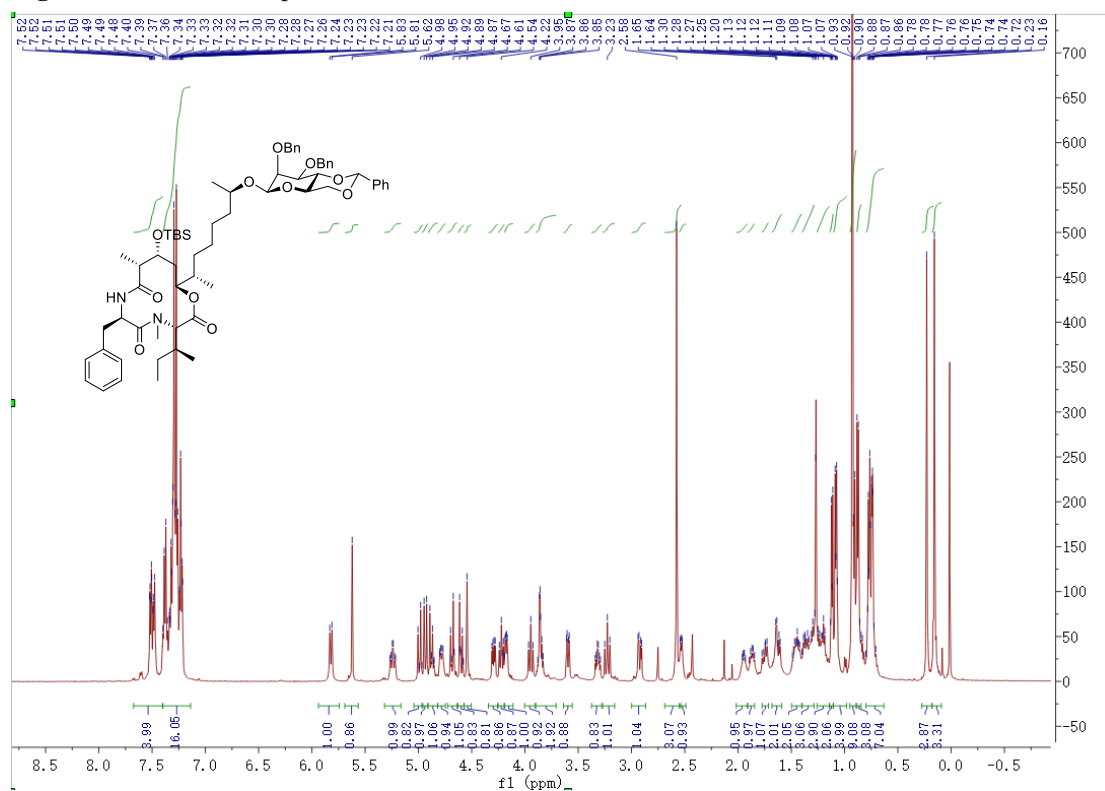

**Figures S30**  $^{13}\text{C}$  NMR Spectrum of **25**

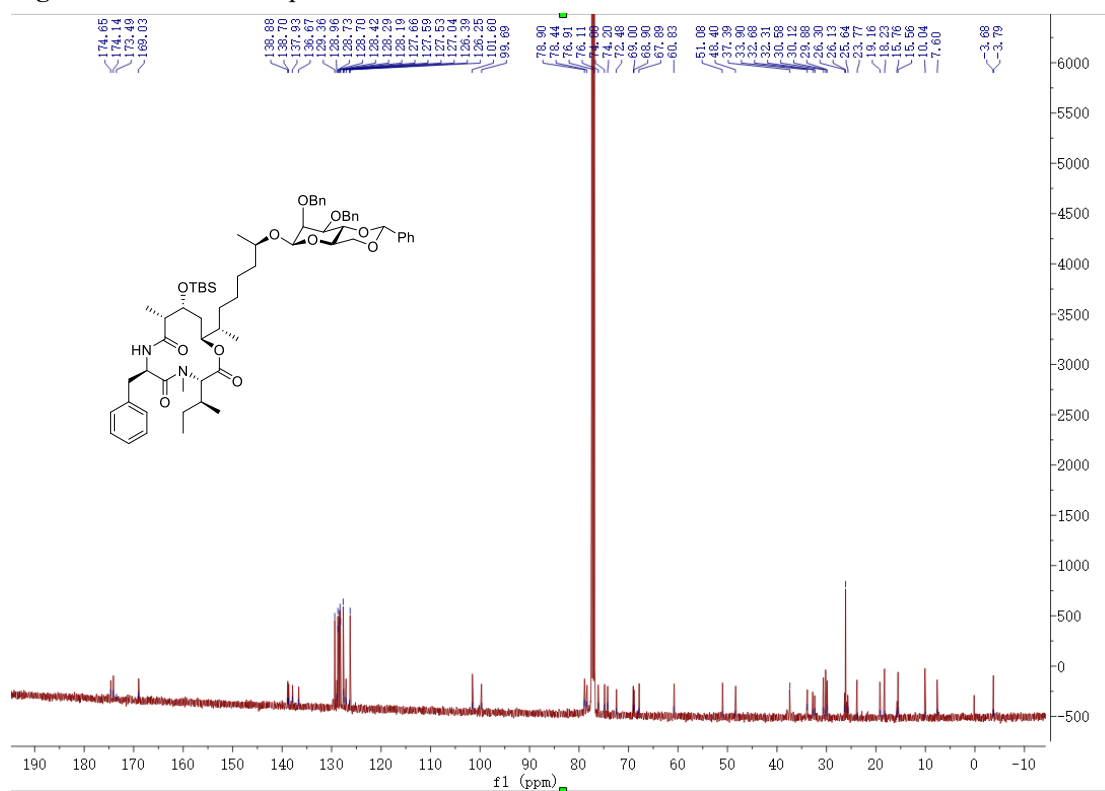

**Figures S31**  $^1\text{H}$  NMR Spectrum of **26**

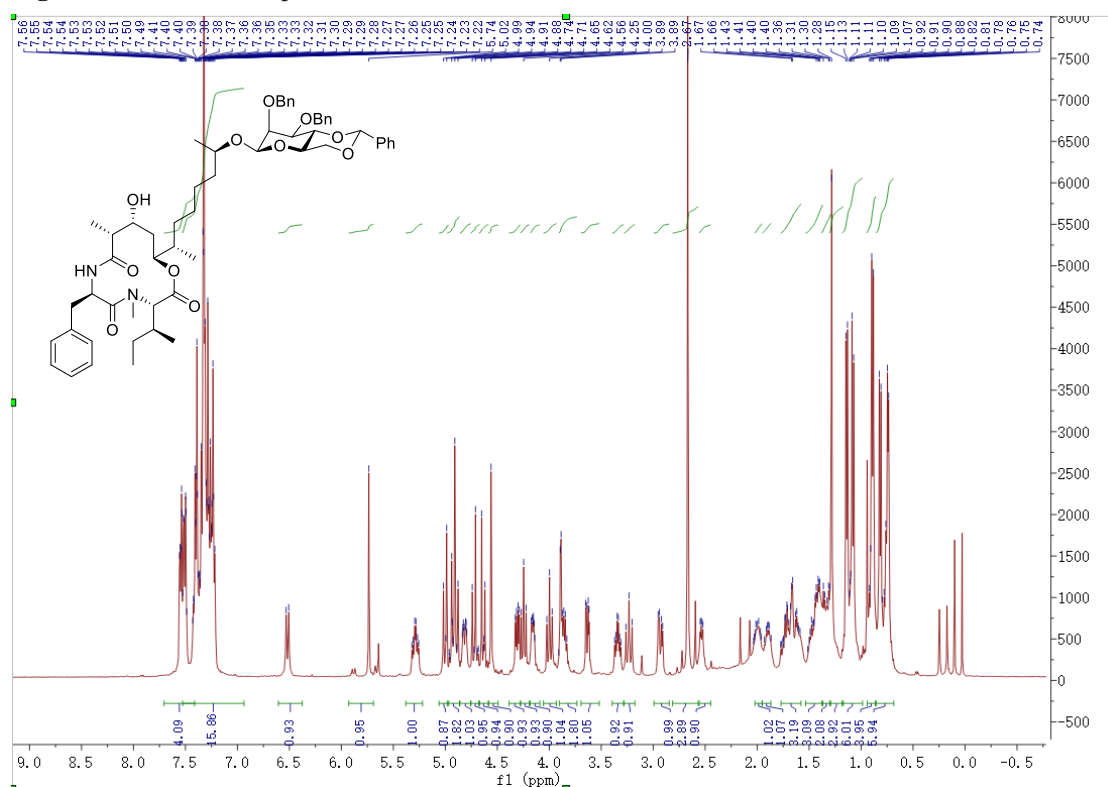

**Figures S32**  $^{13}\text{C}$  NMR Spectrum of **26**

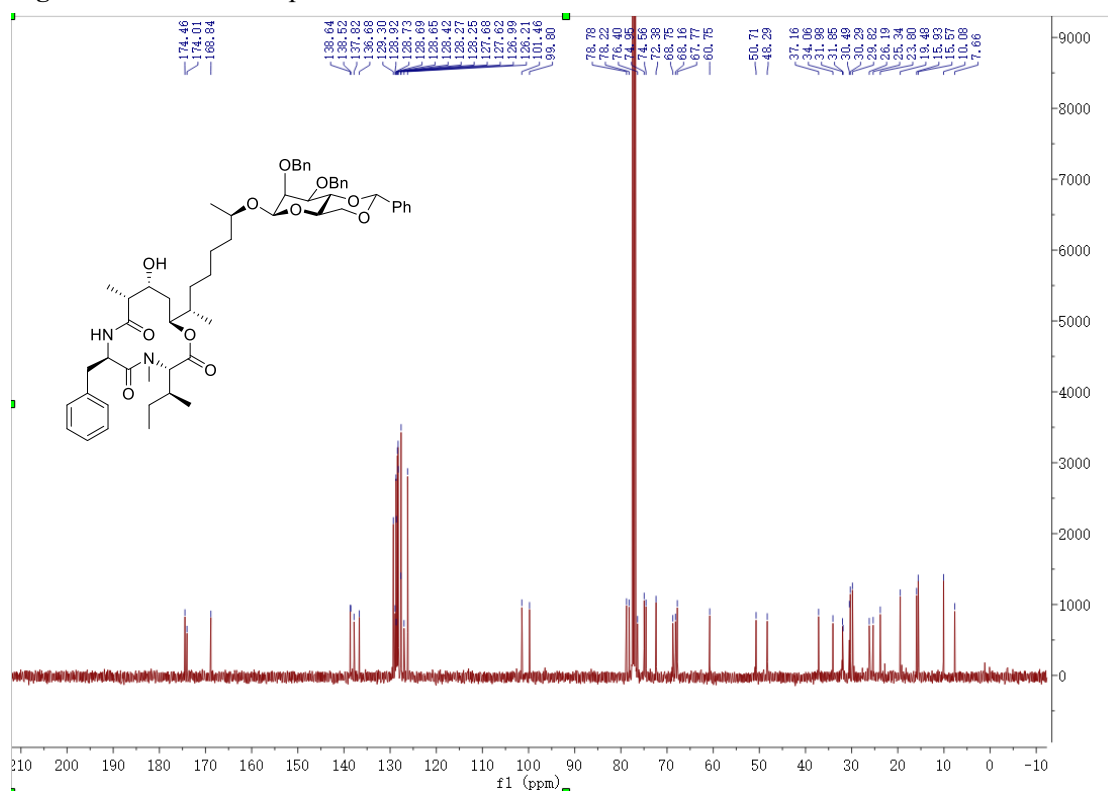

**Figures S33**  $^1\text{H}$  NMR Spectrum of colletotrichamide A

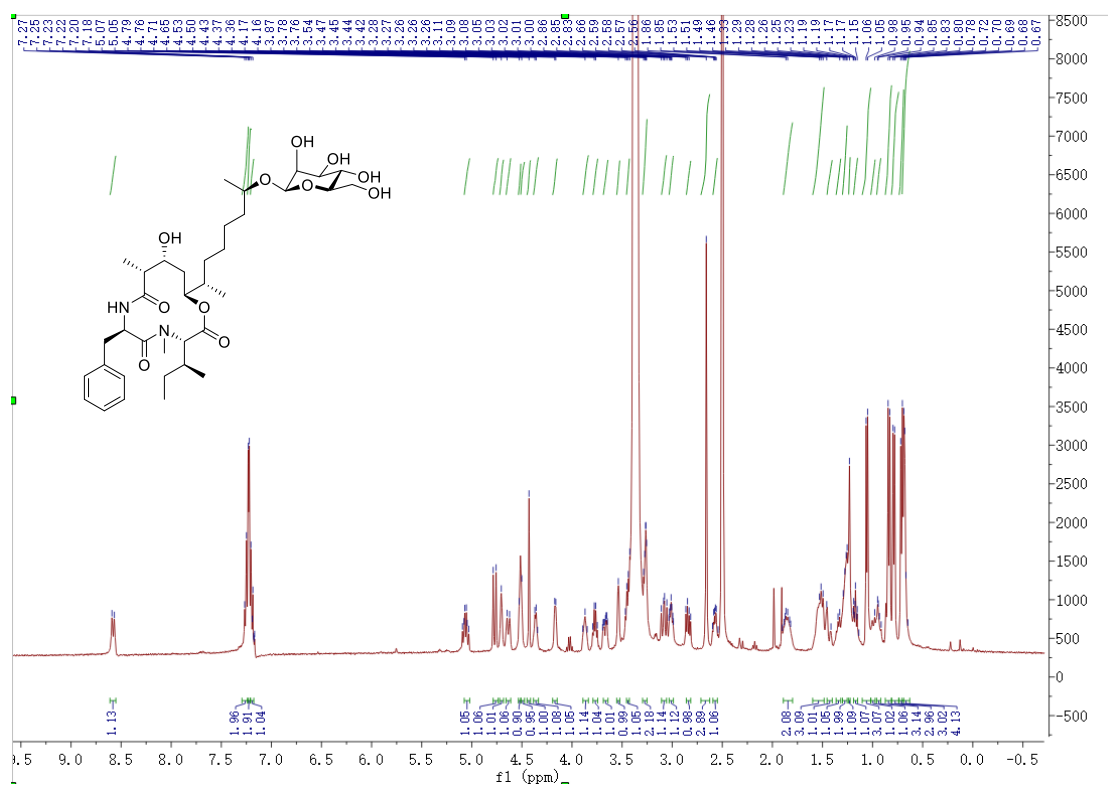

**Figures S34**  $^{13}\text{C}$  NMR Spectrum of colletotrichamide A

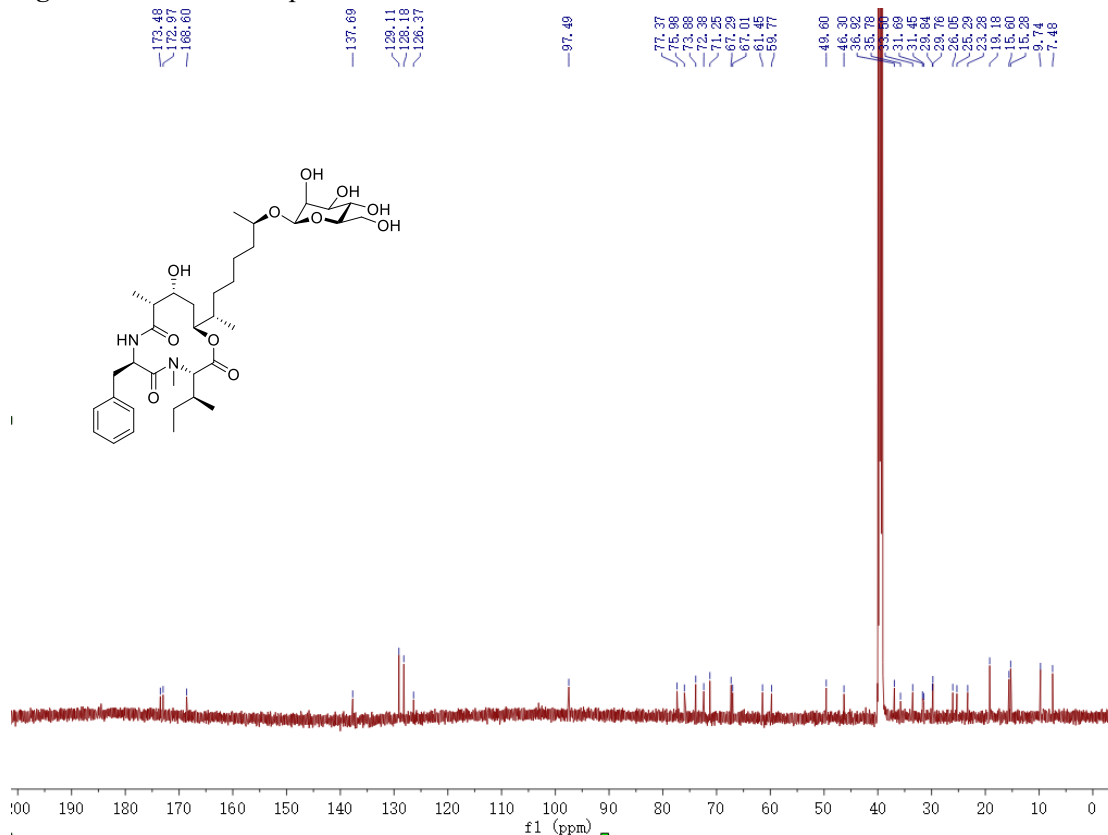

**Figures S35**  $^1\text{H}$  NMR Spectrum of colletopeptide A

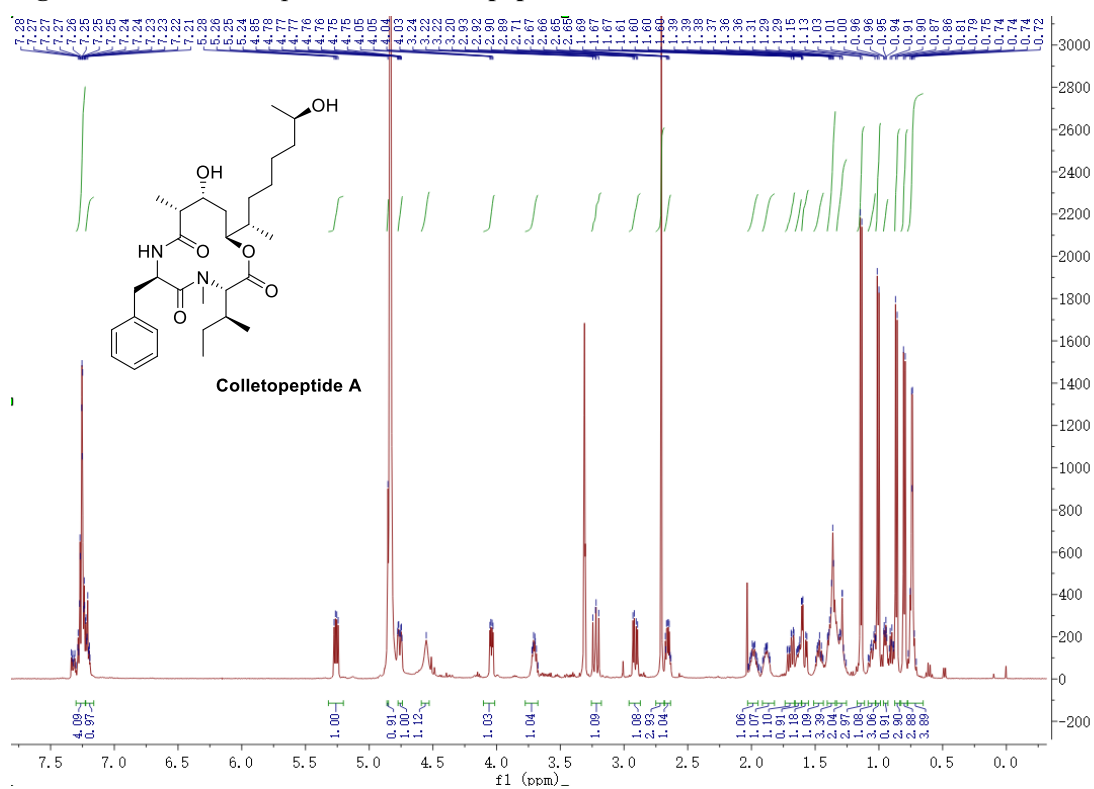

Supplement: s1 [file s1]
